# Supplementary material for: The OBS noise due to deep ocean currents
Source: Copernicus journal article supplement (doi:10.5194/nhess-2022-196), 2022-07-12

## Electronic Supplement

### The OBS noise due to deep ocean currents

Carlos Corela<sup>1</sup>, Afonso Loureiro<sup>1</sup>, José Luis Duarte<sup>1</sup>, Luis Matias<sup>1</sup>, Tiago Rebelo<sup>2</sup>, Tiago Bartolomeu<sup>2</sup>

<sup>1</sup>Instituto Dom Luiz, Faculdade de Ciências, Universidade de Lisboa, 1749-016 Lisboa, Portugal

<sup>2</sup>CEIIA, Av. D. Afonso Henriques, 1825, 4450-017 Matosinhos, Portugal

([ccorela@fc.ul.pt](mailto:ccorela@fc.ul.pt), [jlduarte@fc.ul.pt](mailto:jlduarte@fc.ul.pt), [maloureiro@fc.ul.pt](mailto:maloureiro@fc.ul.pt), [lmatias@fc.ul.pt](mailto:lmatias@fc.ul.pt), [tiago.rebelo@ceiia.com](mailto:tiago.rebelo@ceiia.com), [tiago.bartolomeu@ceiia.com](mailto:tiago.bartolomeu@ceiia.com))

### Contents

This electronic supplement contains a tide table from Sines (Portugal) from 10 September 2007 until 28 September 2007 showing a complete tide cycle from spring to neap tide and finish in a spring tide to shown that the ocean bottom has a flow regime that may have two contributions, the permanent low frequency bottom current and the tidal current. The recorded noise displays the balance between these two currents along the full tidal cycle, between neap and spring tides. We show, for each day of the tide cycle, the day-plot of the OBS data record with ObsPy software, the normalized spectrograms with GMT (Wessel et al., 2013) and the probabilistic power spectral densities with ObsPy (Krischer et al., 2015). The normalized spectrogram have a tide cycle of that day represented as a black curve.

**Table S1 – Tide from Sines (Portugal) between 10/09/2007 and 28/09/2007.**  
 (Source: Instituto Hidrográfico, Marinha - Portugal, [Instituto Hidrográfico \(hidrografico.pt\)](http://instituto-hidrografico.pt))

| Date       | Time  | Tide(m) | Phenomenon    | Tide range(m) |
|------------|-------|---------|---------------|---------------|
| 10/09/2007 | 02:39 | 3.1     | High Tide     | 2.3           |
| 10/09/2007 | 08:46 | 0.9     | Low tide      | 2.2           |
| 10/09/2007 | 14:52 | 3.4     | High Tide     | 2.5           |
| 10/09/2007 | 21:05 | 0.7     | Low Tide      | 2.7           |
| 11/09/2007 | 03:12 | 3.2     | High Tide     | 2.5           |
| 11/09/2007 | 09:09 | 0.8     | Low Tide      | 2.4           |
| 11/09/2007 | 13:44 | -       | New Moon      |               |
| 11/09/2007 | 15:25 | 3.4     | High Tide     | 2.6           |
| 11/09/2007 | 21:35 | 0.6     | Low Tide      | 2.8           |
| 12/09/2007 | 03:43 | 3.2     | High Tide     | 2.6           |
| 12/09/2007 | 09:40 | 0.7     | Low Tide      | 2.5           |
| 12/09/2007 | 15:56 | 3.4     | High Tide     | 2.7           |
| 12/09/2007 | 22:04 | 0.7     | Low Tide      | 2.7           |
| 13/09/2007 | 04:13 | 3.2     | High Tide     | 2.5           |
| 13/09/2007 | 10:10 | 0.7     | Low Tide      | 2.5           |
| 13/09/2007 | 16:26 | 3.4     | High Tide     | 2.7           |
| 13/09/2007 | 22:32 | 0.7     | Low Tide      | 2.7           |
| 14/09/2007 | 04:42 | 3.2     | High Tide     | 2.5           |
| 14/09/2007 | 10:40 | 0.8     | Low Tide      | 2.4           |
| 14/09/2007 | 16:55 | 3.3     | High Tide     | 2.5           |
| 14/09/2007 | 22:59 | 0.8     | Low Tide      | 2.5           |
| 15/09/2007 | 05:11 | 3.1     | High Tide     | 2.3           |
| 15/09/2007 | 11:10 | 0.9     | Low Tide      | 2.2           |
| 15/09/2007 | 17:25 | 3.1     | High Tide     | 2.2           |
| 15/09/2007 | 23:27 | 1.0     | Low Tide      | 2.1           |
| 16/09/2007 | 05:40 | 3.0     | High Tide     | 2.0           |
| 16/09/2007 | 11:41 | 1.0     | Low Tide      | 2.0           |
| 16/09/2007 | 17:56 | 2.9     | High Tide     | 1.9           |
| 16/09/2007 | 23:57 | 1.1     | Low Tide      | 1.8           |
| 17/09/2007 | 06:13 | 2.9     | High Tide     | 1.8           |
| 17/09/2007 | 12:16 | 1.2     | Low Tide      | 1.7           |
| 17/09/2007 | 18:30 | 2.7     | High Tide     | 1.5           |
| 18/09/2007 | 00:30 | 1.3     | Low Tide      | 1.4           |
| 18/09/2007 | 06:51 | 2.7     | High Tide     | 1.4           |
| 18/09/2007 | 12:58 | 1.4     | Low Tide      | 1.3           |
| 18/09/2007 | 19:13 | 2.5     | High Tide     | 1.1           |
| 19/09/2007 | 01:12 | 1.5     | Low Tide      | 1.0           |
| 19/09/2007 | 07:43 | 2.6     | High Tide     | 1.1           |
| 19/09/2007 | 13:59 | 1.5     | Low Tide      | 1.1           |
| 19/09/2007 | 17:48 |         | First quarter |               |
| 19/09/2007 | 20:19 | 2.4     | High Tide     | 0.9           |
| 20/09/2007 | 02:21 | 1.6     | Low Tide      | 0.8           |

|            |       |     |           |     |
|------------|-------|-----|-----------|-----|
| 20/09/2007 | 09:04 | 2.5 | High Tide | 0.9 |
| 20/09/2007 | 15:45 | 1.6 | Low Tide  | 0.9 |
| 20/09/2007 | 22:05 | 2.3 | High Tide | 0.7 |
| 21/09/2007 | 04:19 | 1.7 | Low Tide  | 0.6 |
| 21/09/2007 | 10:46 | 2.5 | High Tide | 1.0 |
| 21/09/2007 | 17:32 | 1.5 | Low Tide  | 0.9 |
| 21/09/2007 | 23:43 | 2.4 | High Tide | 0.9 |
| 22/09/2007 | 05:48 | 1.5 | Low Tide  | 0.9 |
| 22/09/2007 | 12:01 | 2.7 | High Tide | 1.2 |
| 22/09/2007 | 18:33 | 1.3 | Low Tide  | 1.4 |
| 23/09/2007 | 00:41 | 2.6 | High Tide | 1.3 |
| 23/09/2007 | 06:42 | 1.3 | Low Tide  | 1.3 |
| 23/09/2007 | 12:53 | 3.0 | High Tide | 1.7 |
| 23/09/2007 | 19:17 | 1.0 | Low Tide  | 2.0 |
| 24/09/2007 | 01:25 | 2.9 | High Tide | 1.9 |
| 24/09/2007 | 07:25 | 1.0 | Low Tide  | 1.9 |
| 24/09/2007 | 13:35 | 3.2 | High Tide | 2.2 |
| 24/09/2007 | 19:55 | 0.7 | Low Tide  | 2.5 |
| 25/09/2007 | 02:03 | 3.2 | High Tide | 2.5 |
| 25/09/2007 | 08:03 | 0.8 | Low Tide  | 2.4 |
| 25/09/2007 | 14:15 | 3.5 | High Tide | 2.7 |
| 25/09/2007 | 20:31 | 0.5 | Low Tide  | 3.0 |
| 26/07/2007 | 02:41 | 3.4 | High Tide | 2.9 |
| 26/07/2007 | 08:42 | 0.6 | Low Tide  | 3.1 |
| 26/07/2007 | 14:55 | 3.7 | High Tide | 3.1 |
| 26/07/2007 | 20:45 |     | Full Moon |     |
| 26/07/2007 | 21:08 | 0.4 | Low Tide  | 3.3 |
| 27/07/2007 | 03:19 | 3.5 | High Tide | 3.1 |
| 27/07/2007 | 09:20 | 0.4 | Low Tide  | 3.1 |
| 27/07/2007 | 15:36 | 3.8 | High Tide | 3.4 |
| 27/07/2007 | 21:46 | 0.3 | Low Tide  | 3.5 |
| 28/07/2007 | 03:58 | 3.6 | High Tide | 3.3 |
| 28/07/2007 | 10:01 | 0.3 | Low Tide  | 3.3 |
| 28/07/2007 | 16:17 | 3.8 | High Tide | 3.5 |
| 28/07/2007 | 22:25 | 0.4 | Low Tide  | 3.4 |

Tide range – Difference between the amplitude of High Tide and Low Tide

Yellow – face of the moon

Green – Spring Tide

Blue – Neap Tide

# Sequence from spring tide to neap tide and back to spring tide (2007-09-10 to 2007-09-28)

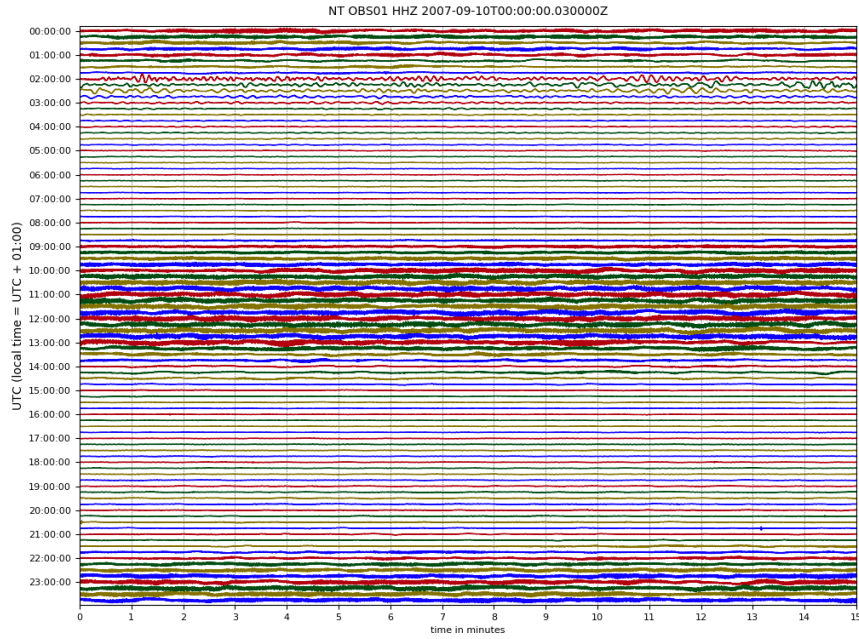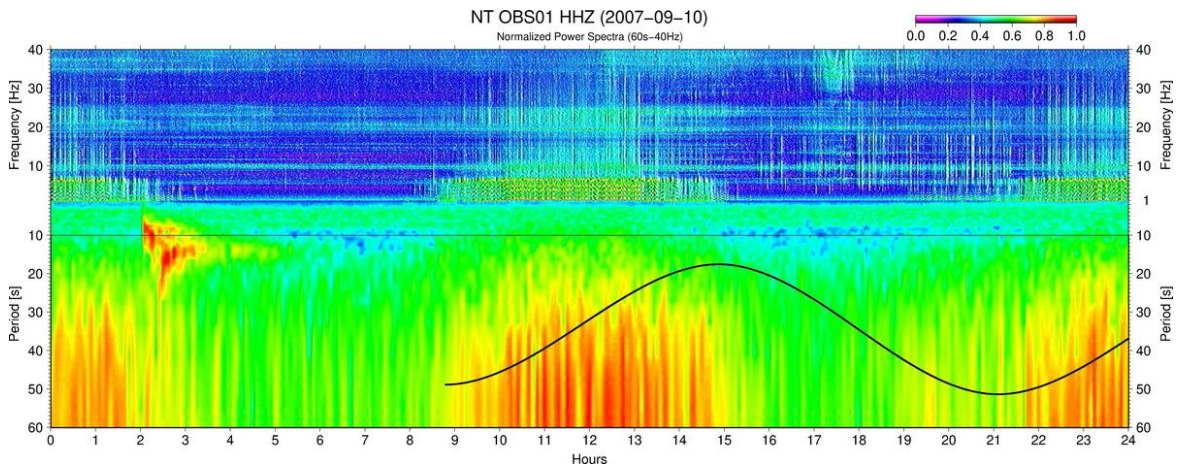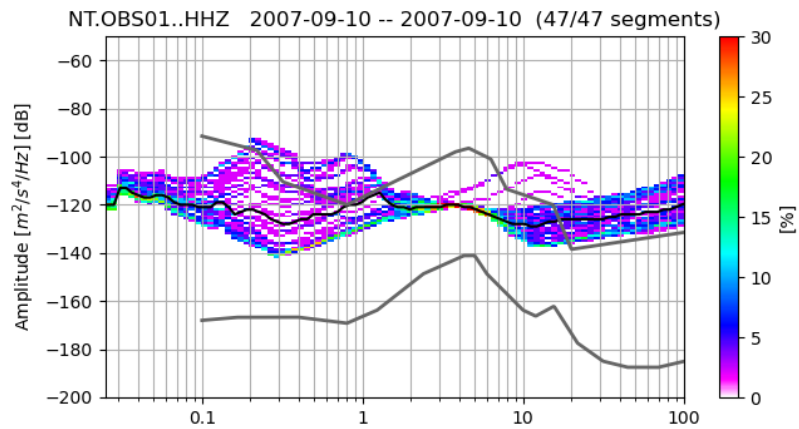

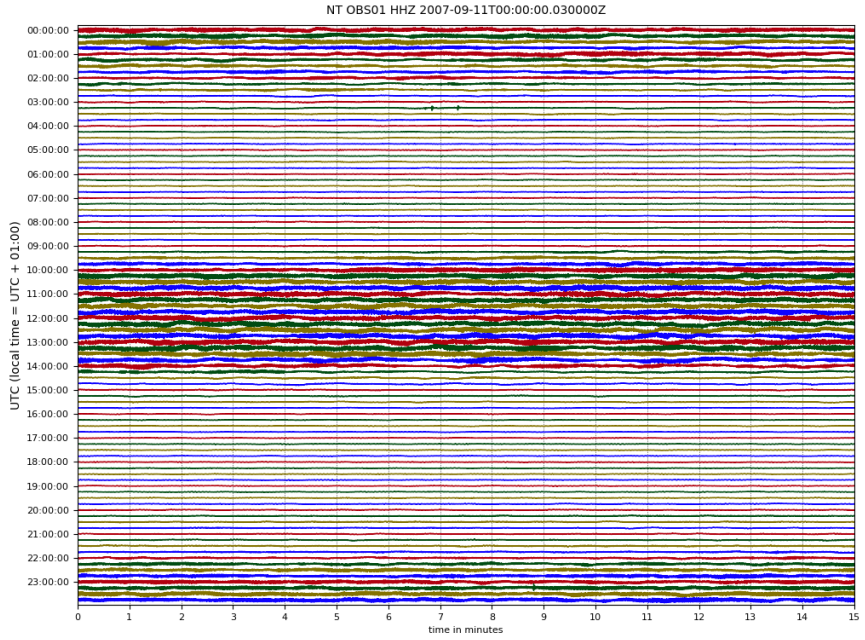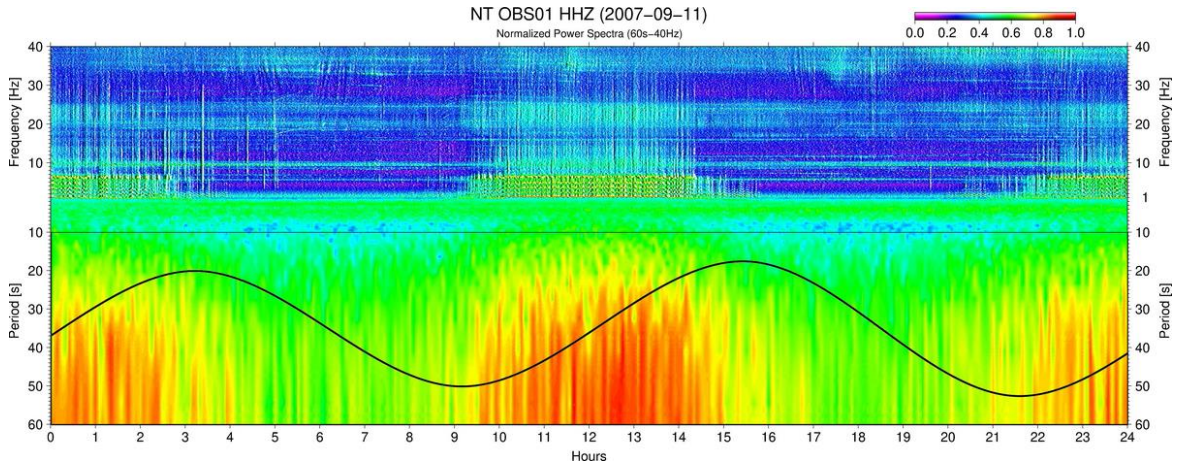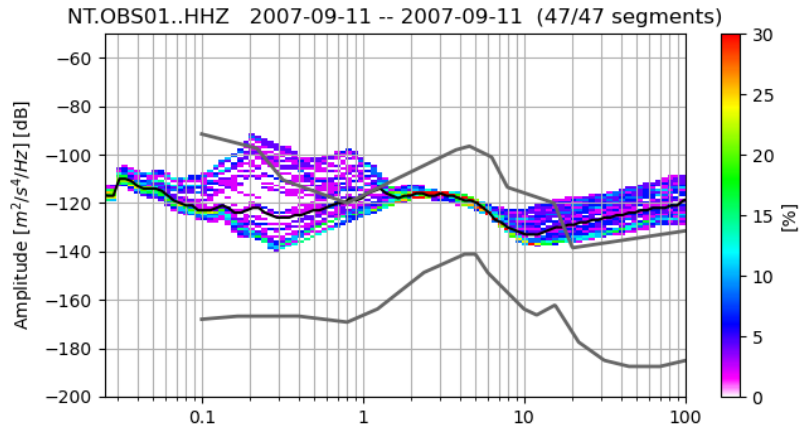

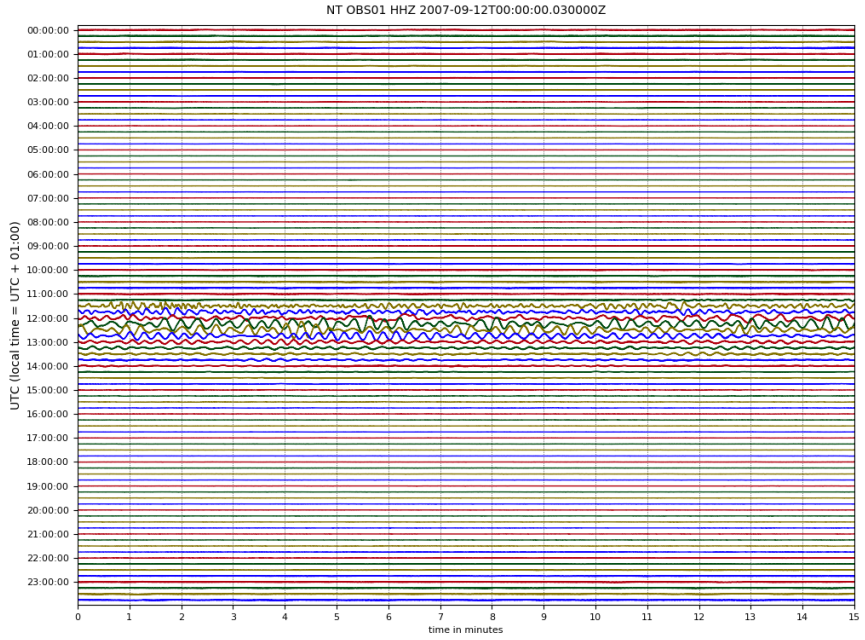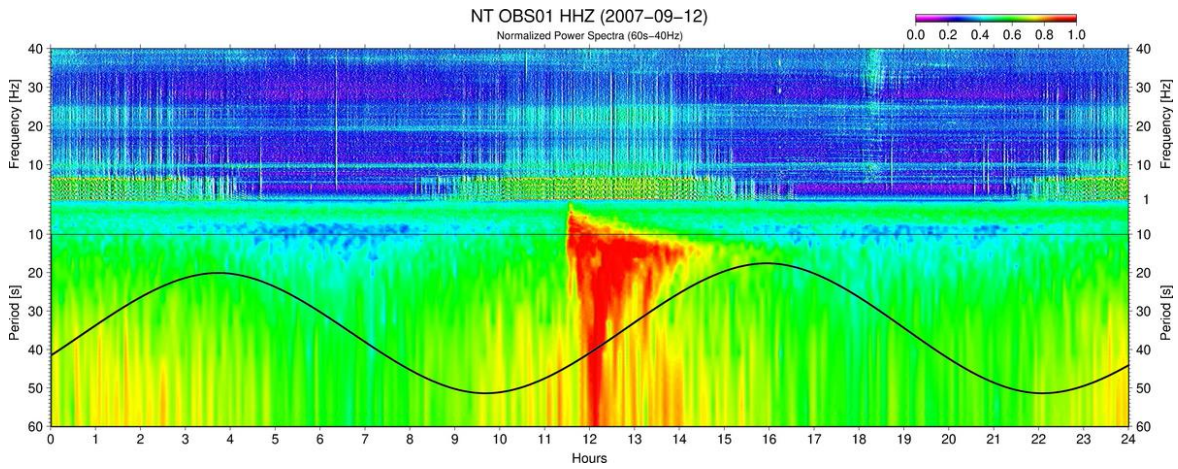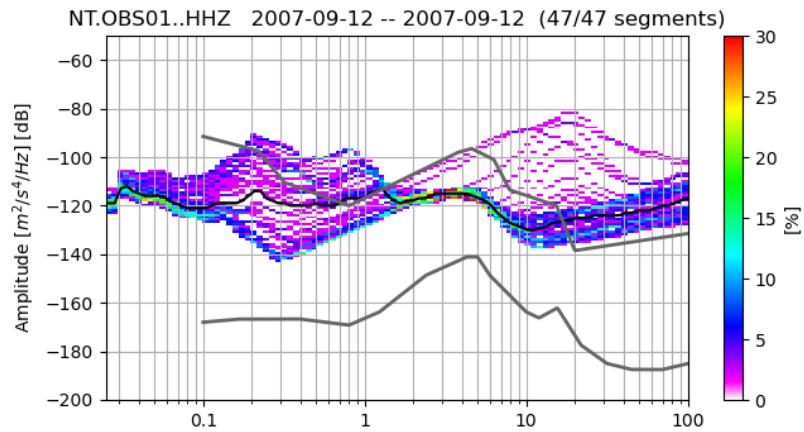

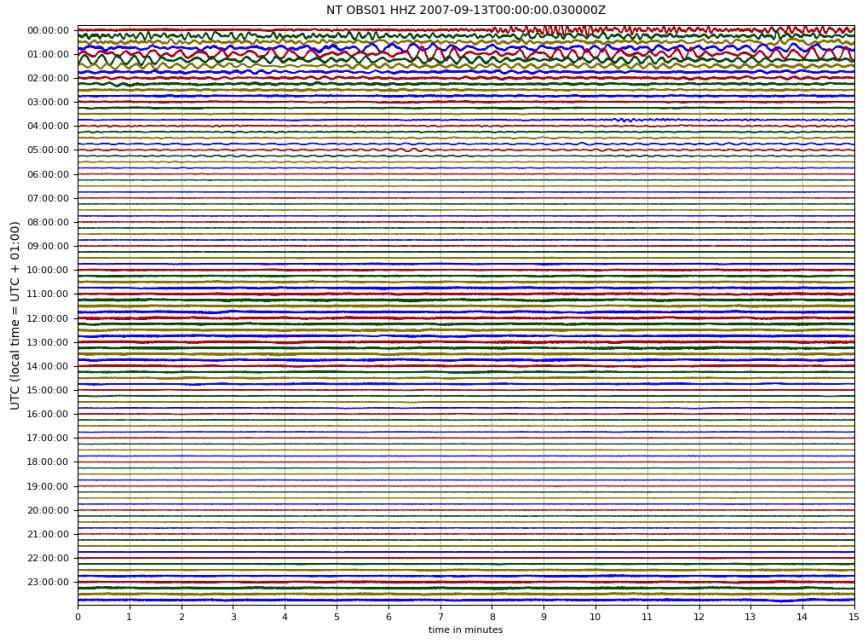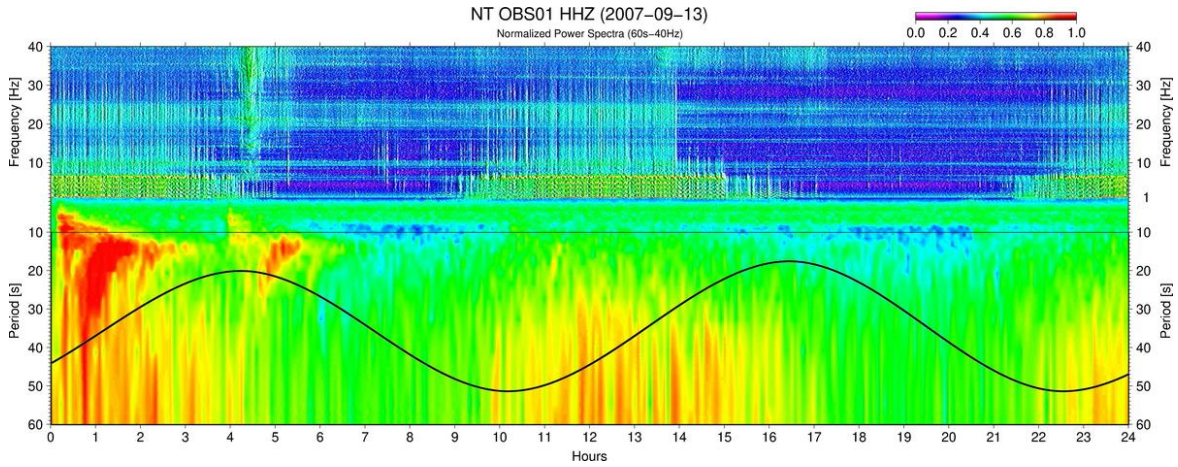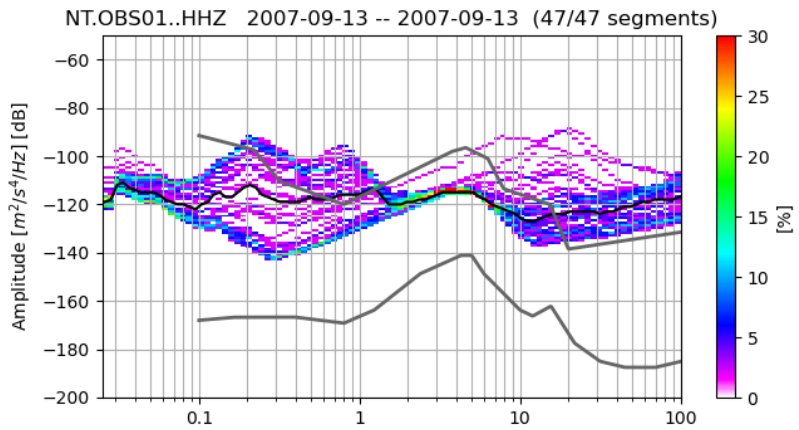

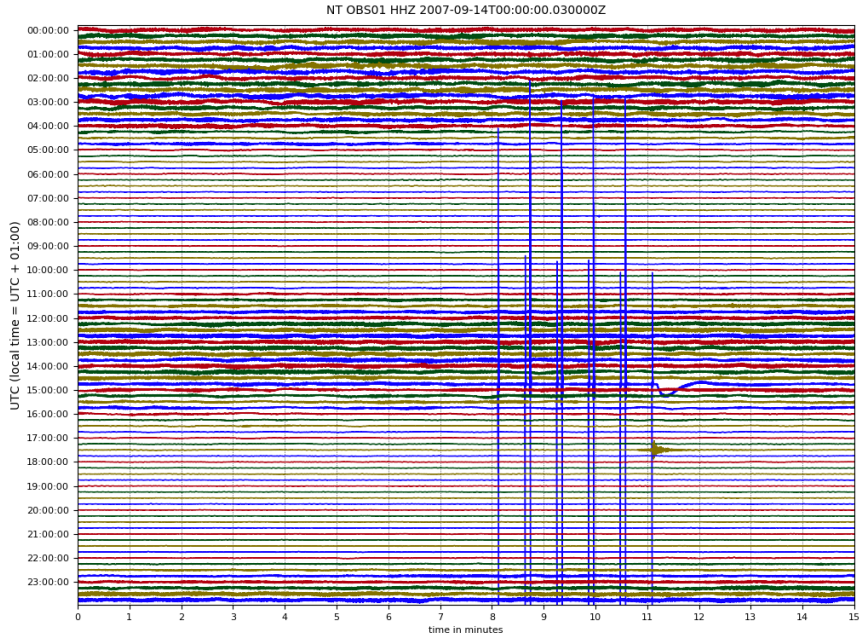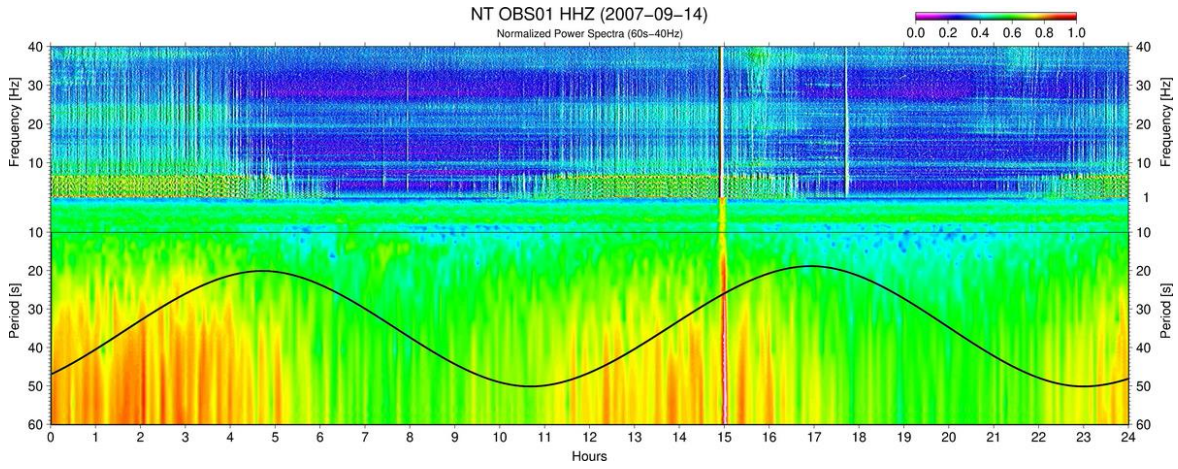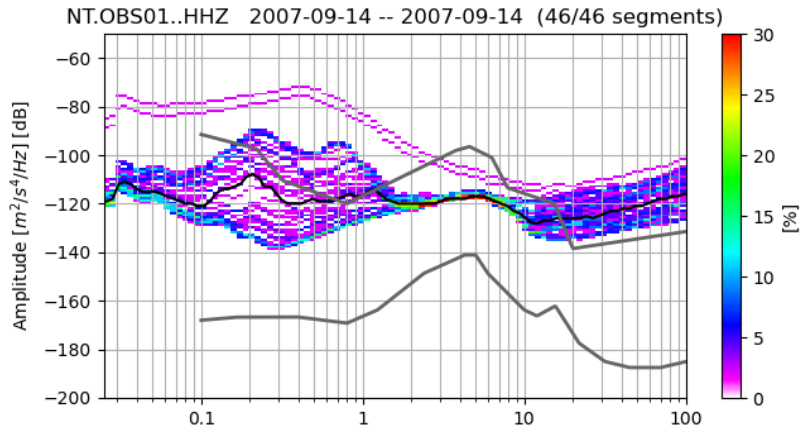



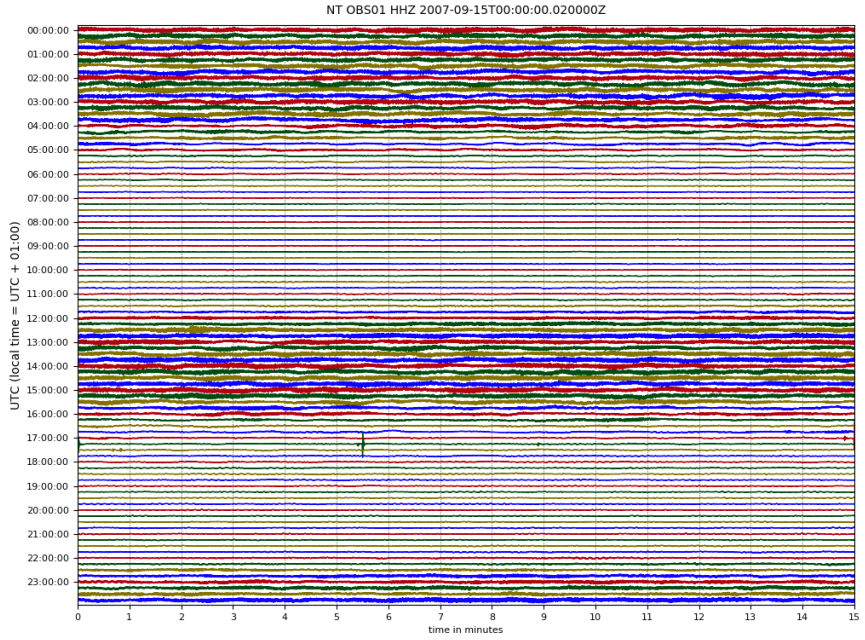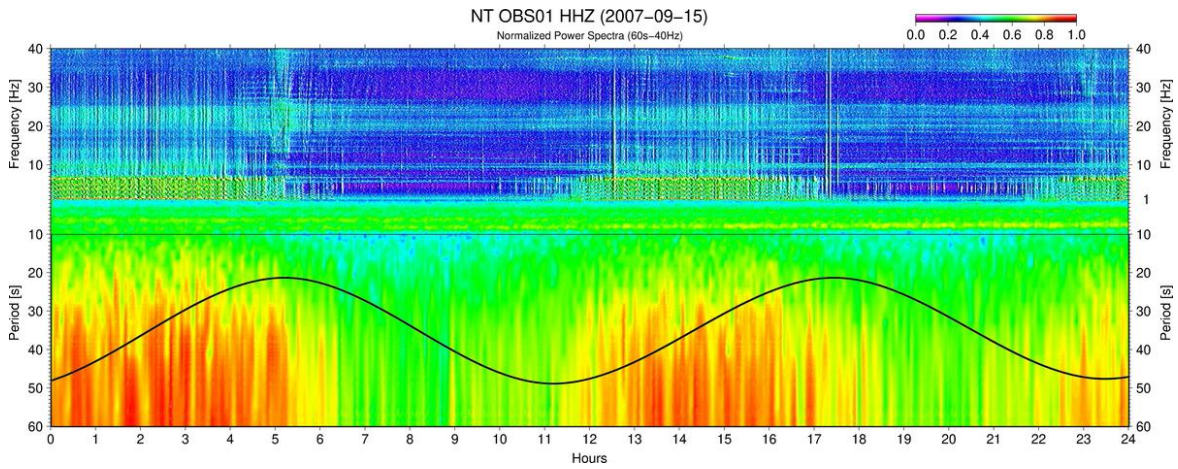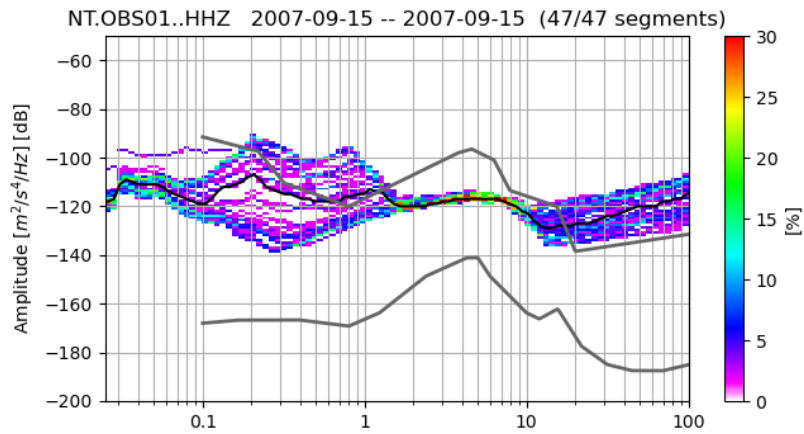

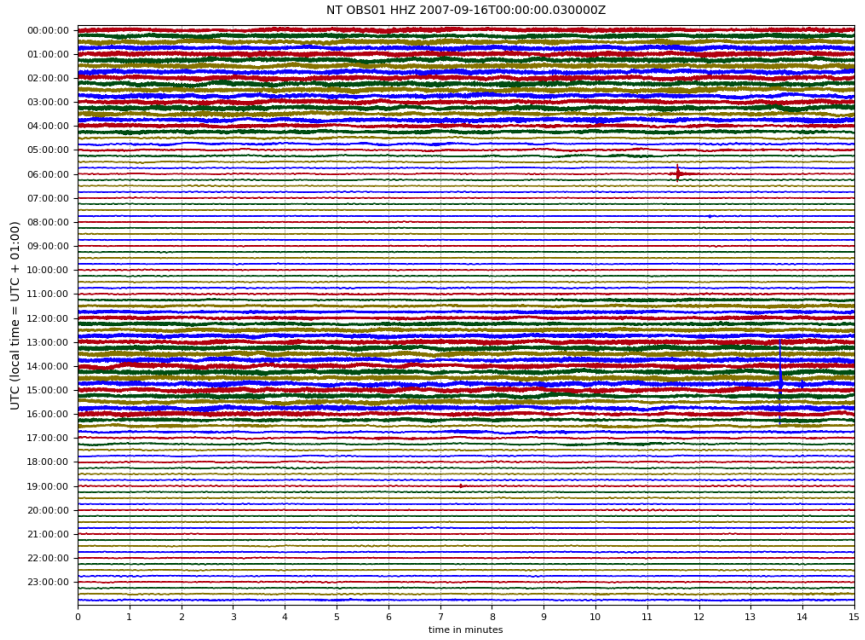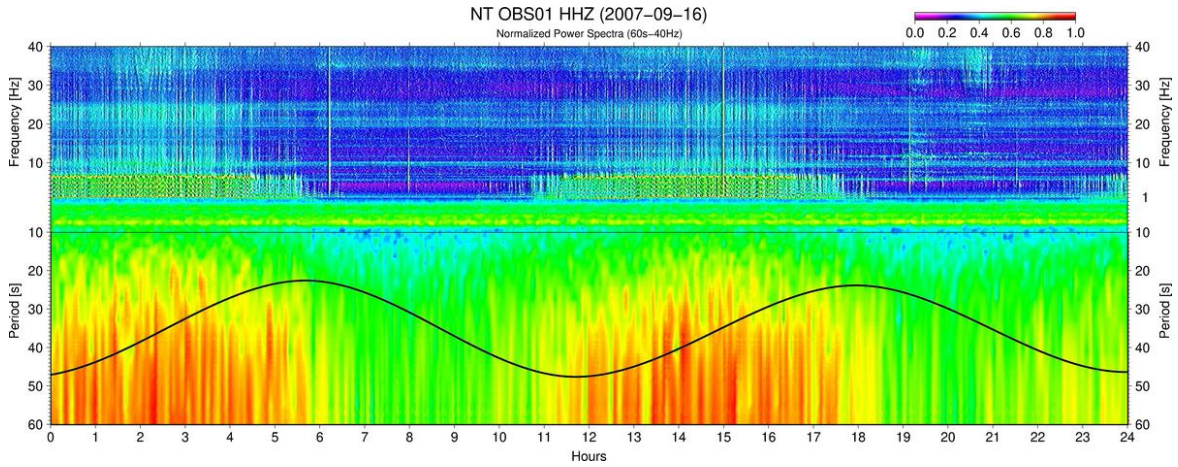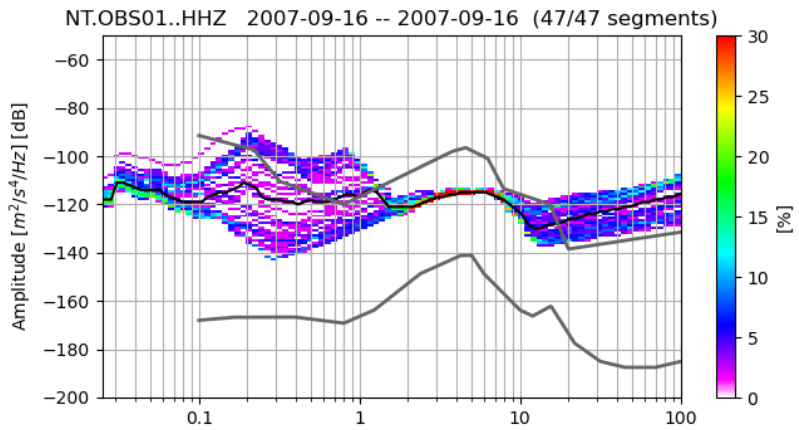

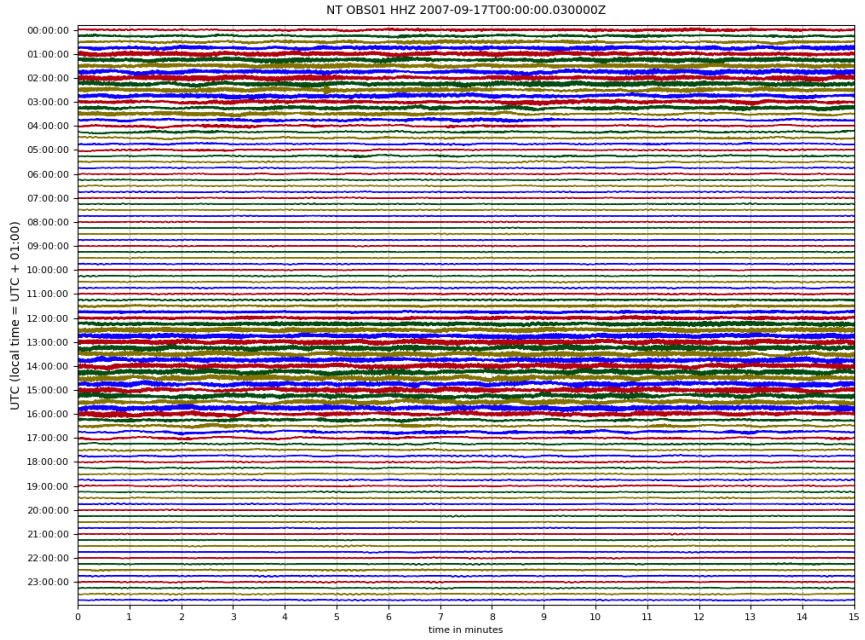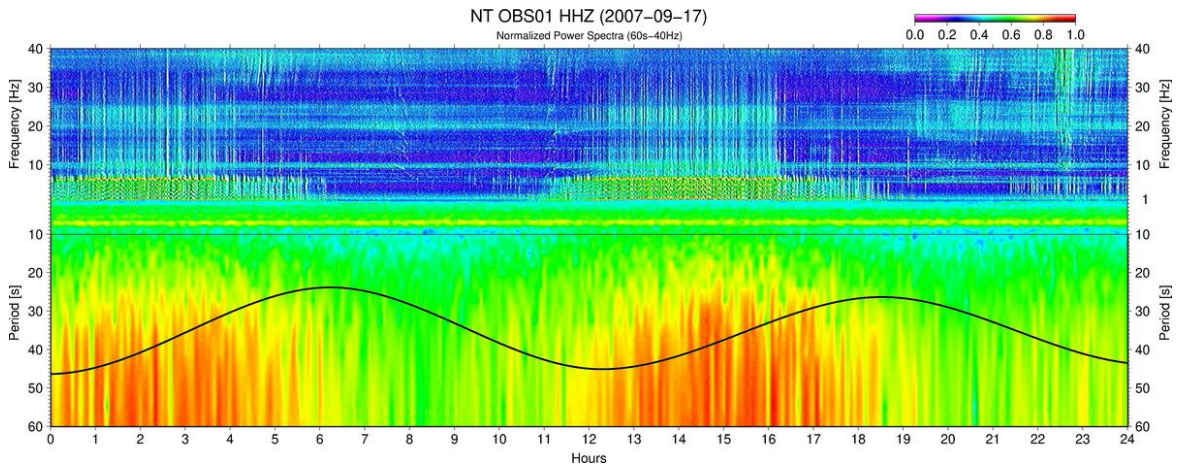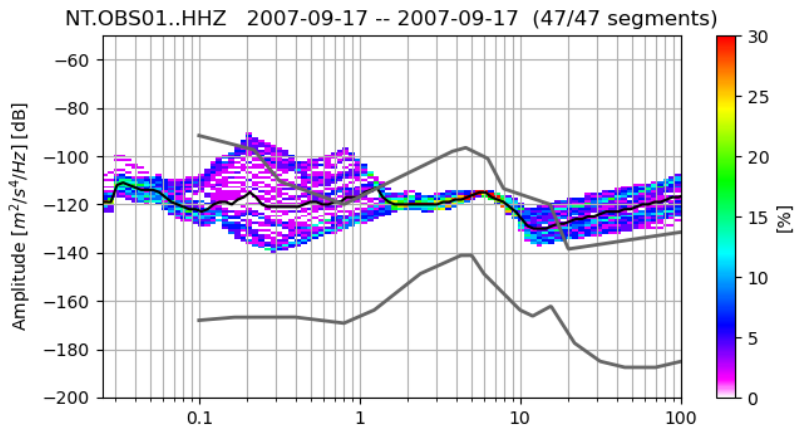

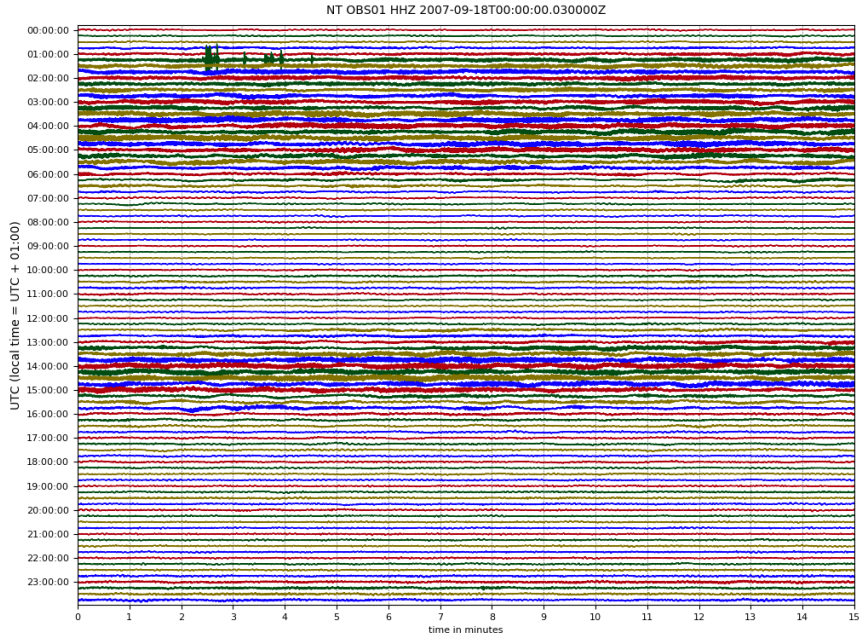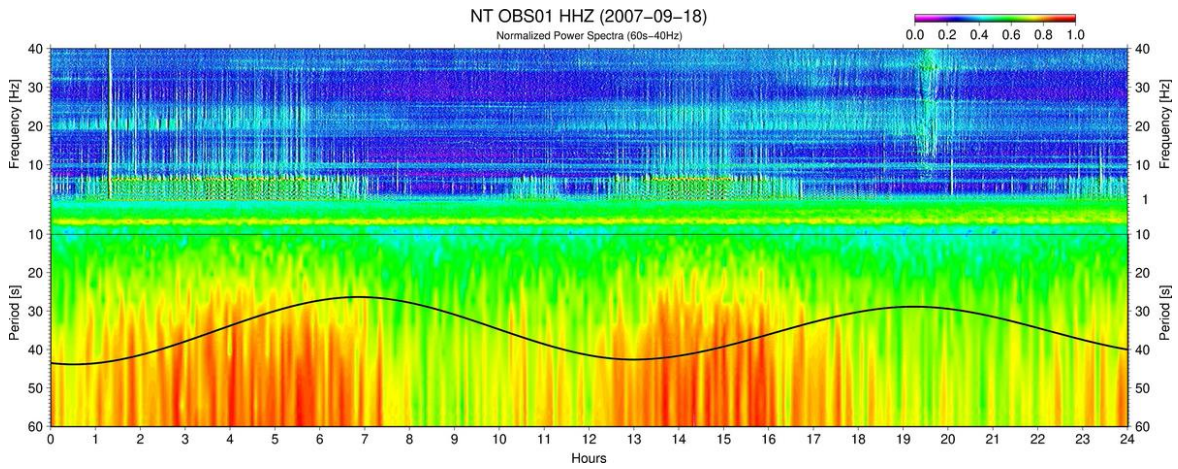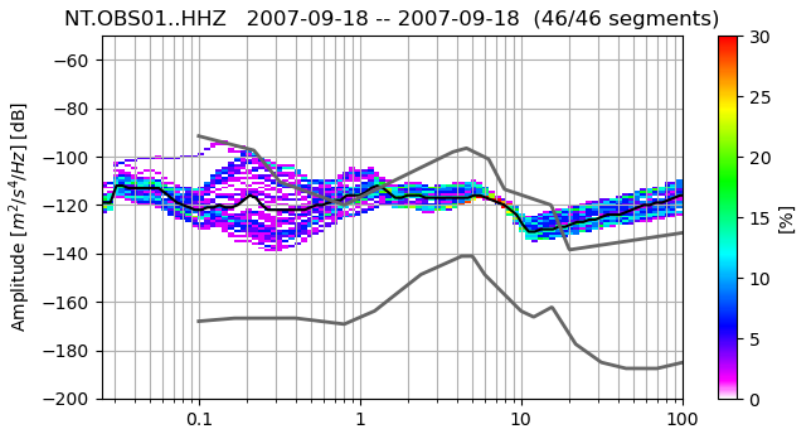

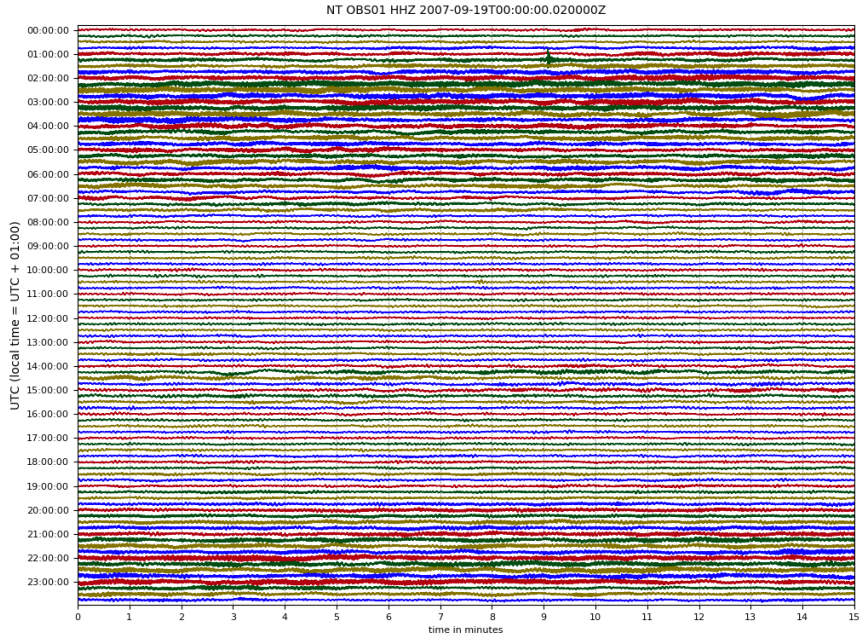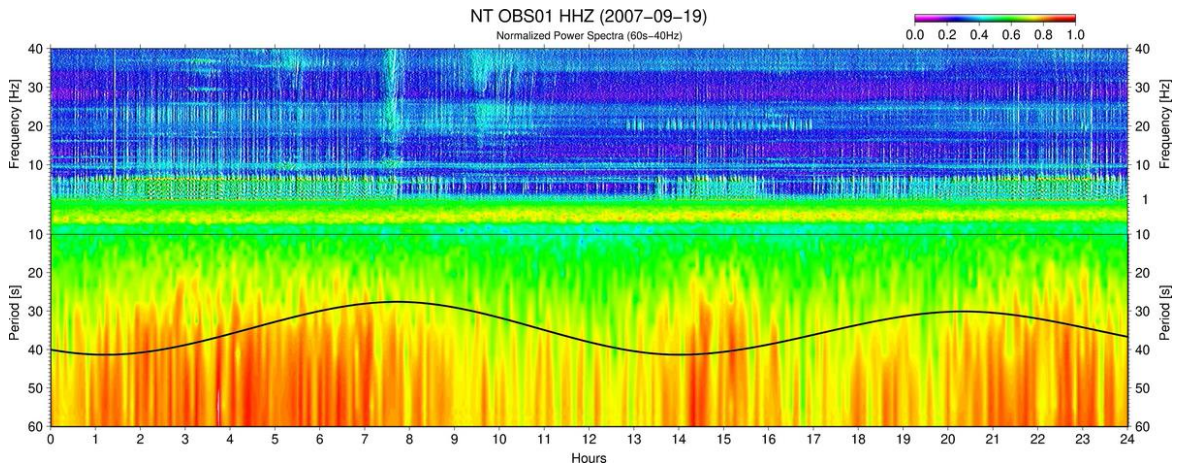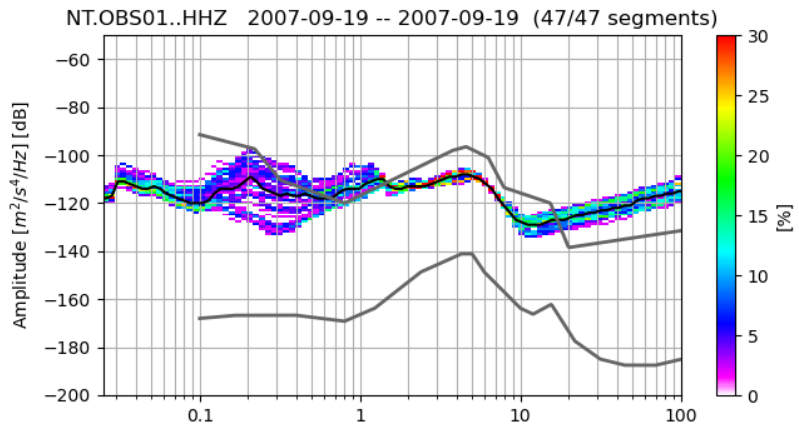

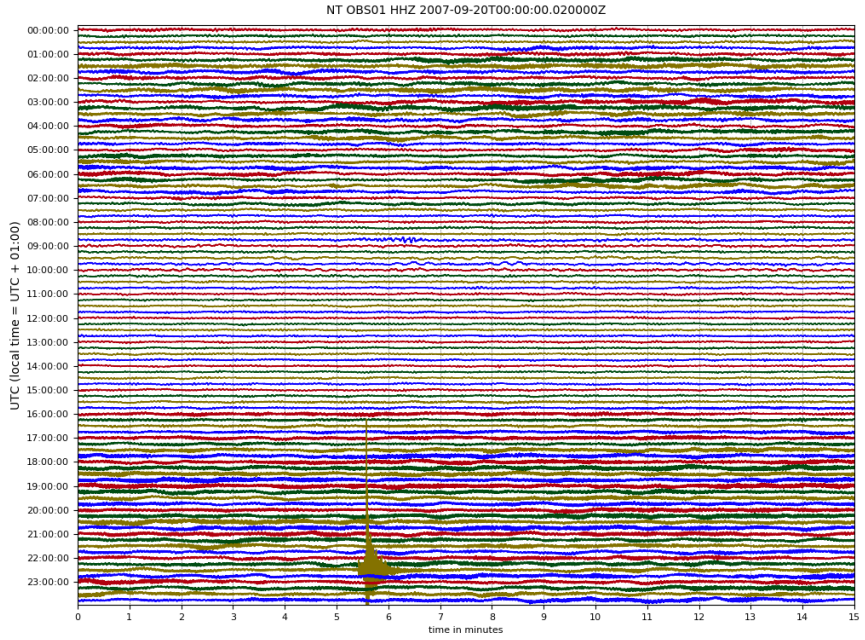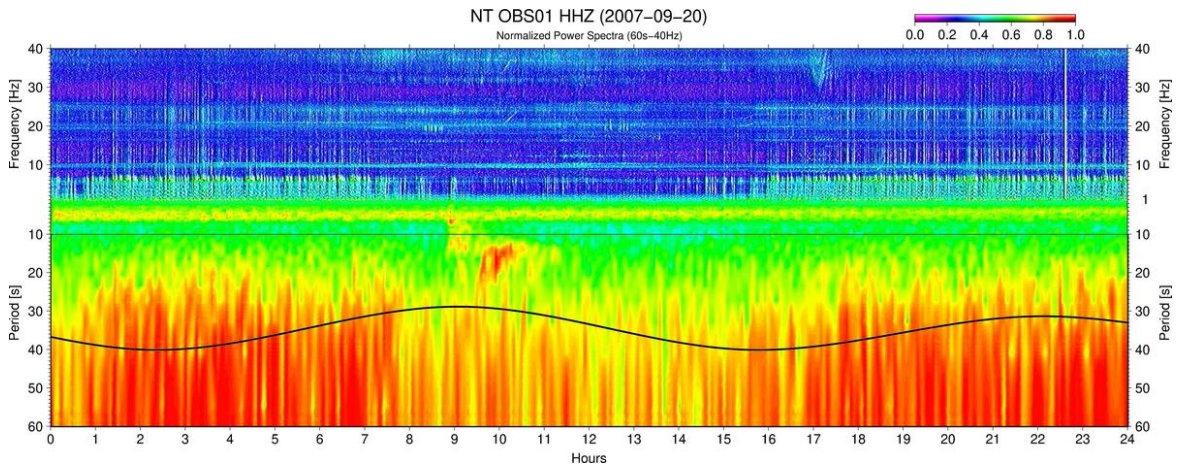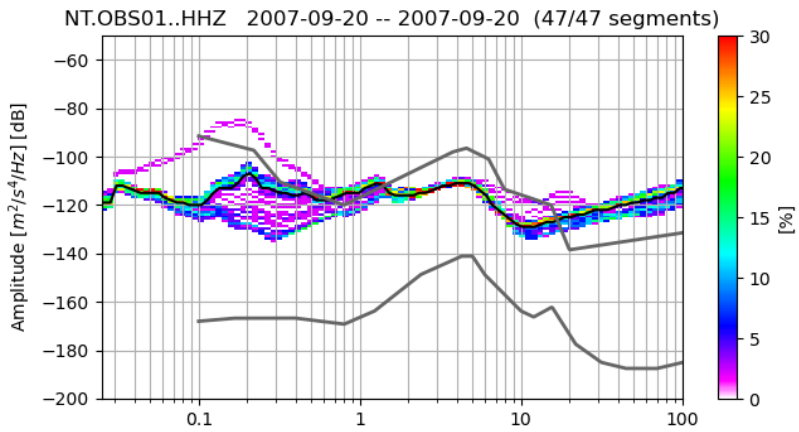

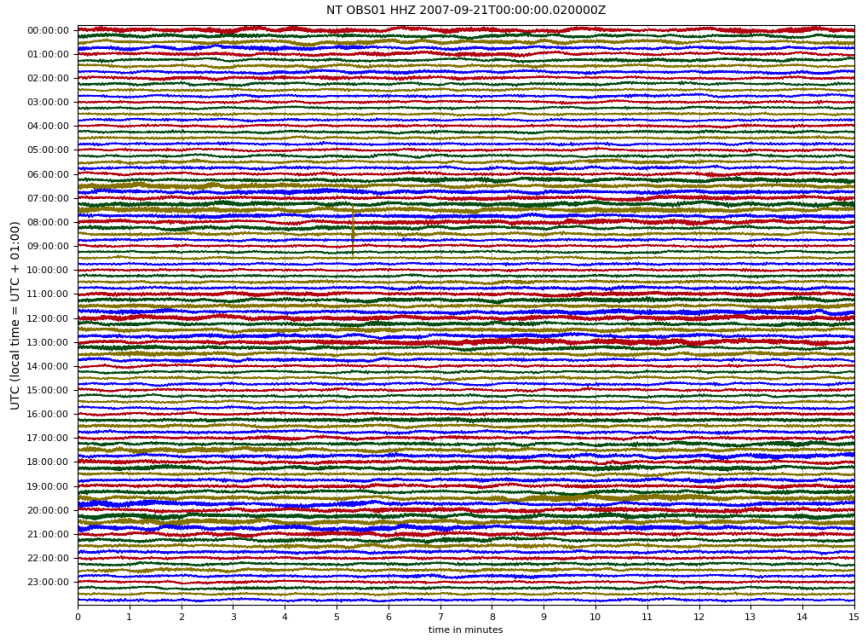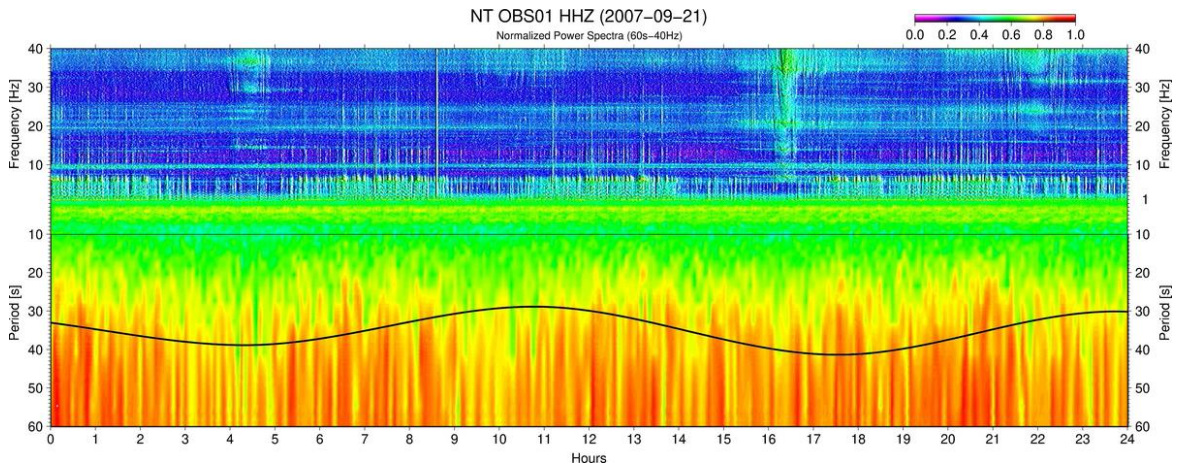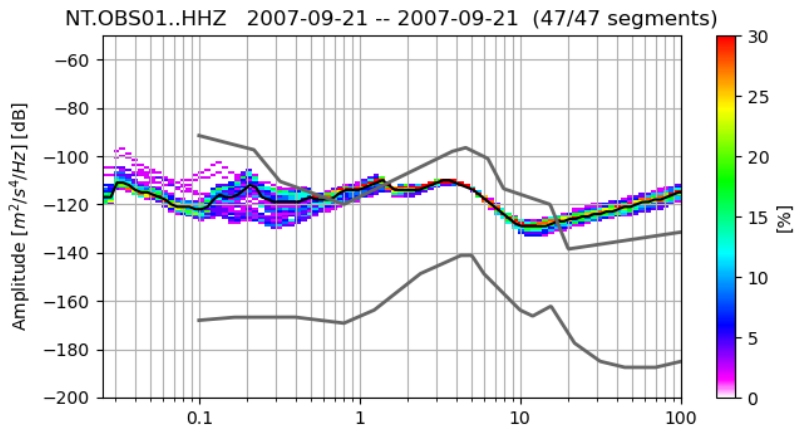

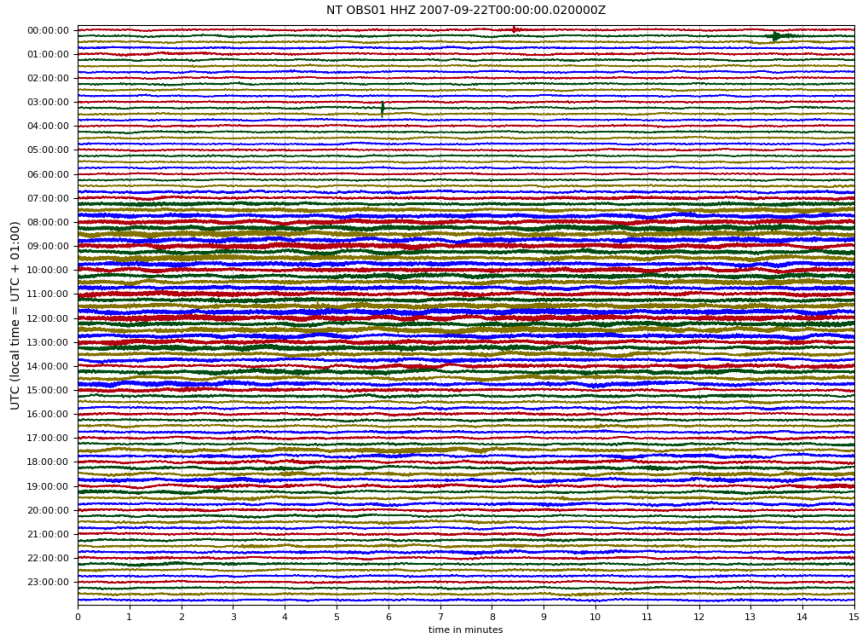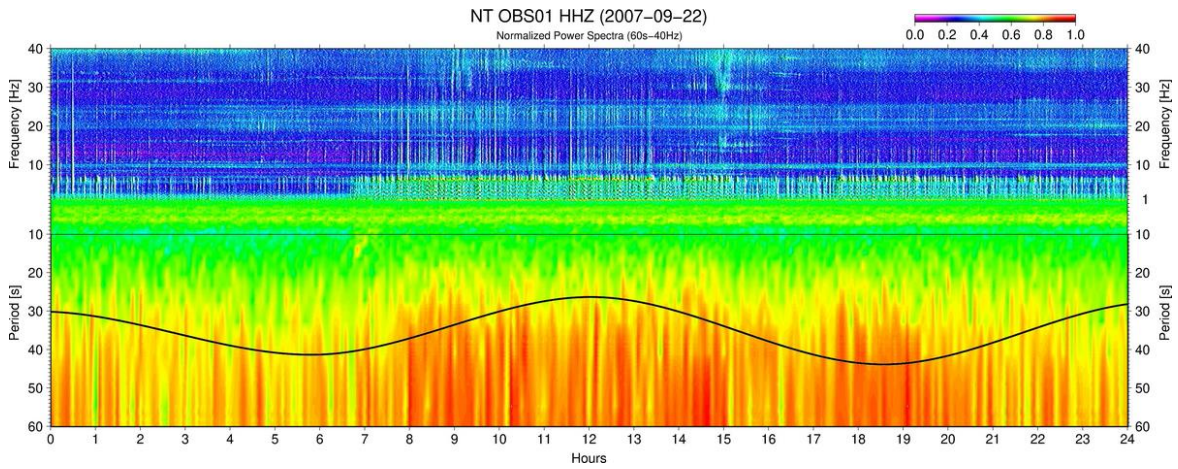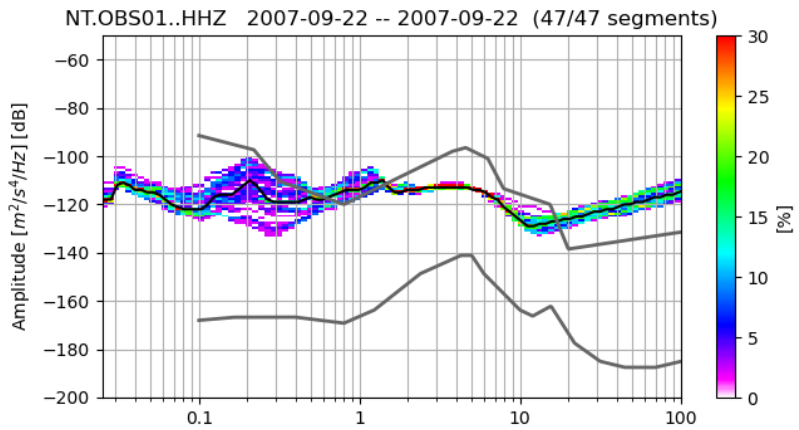



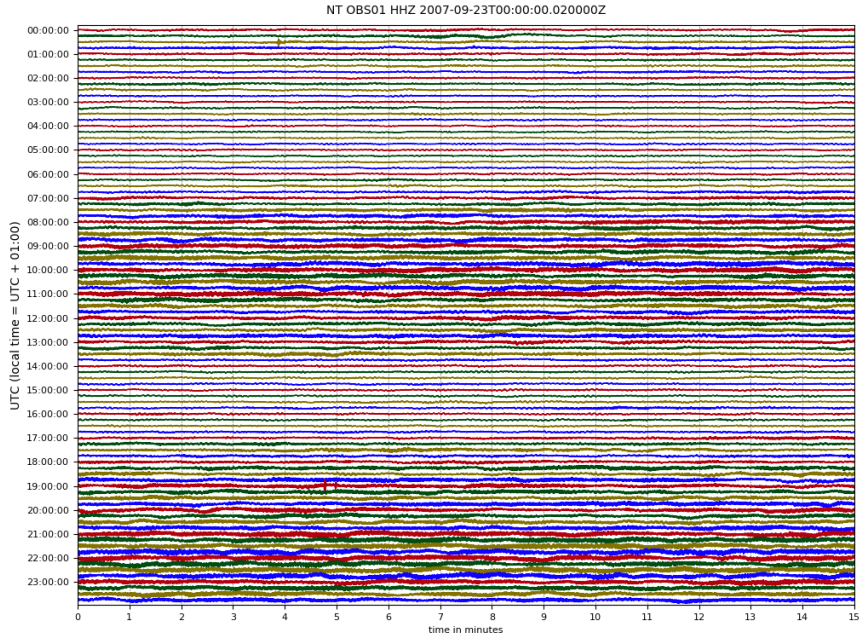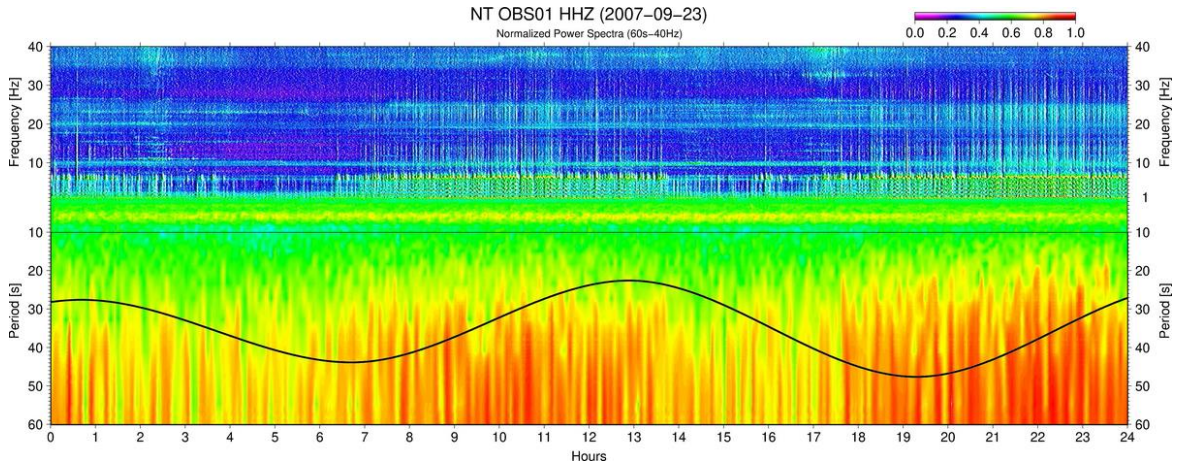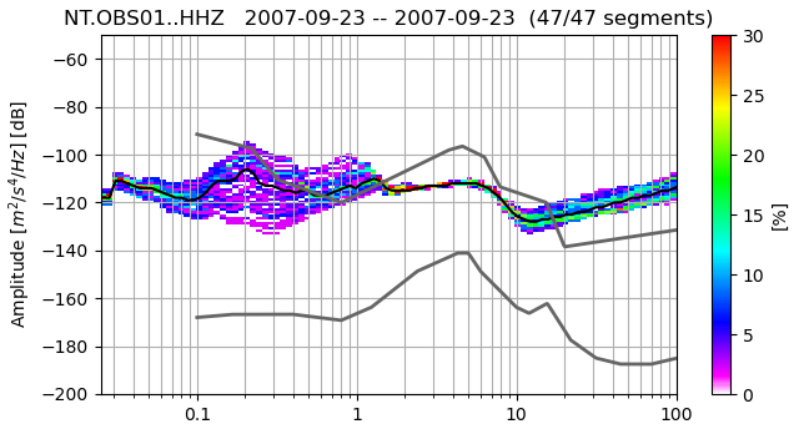

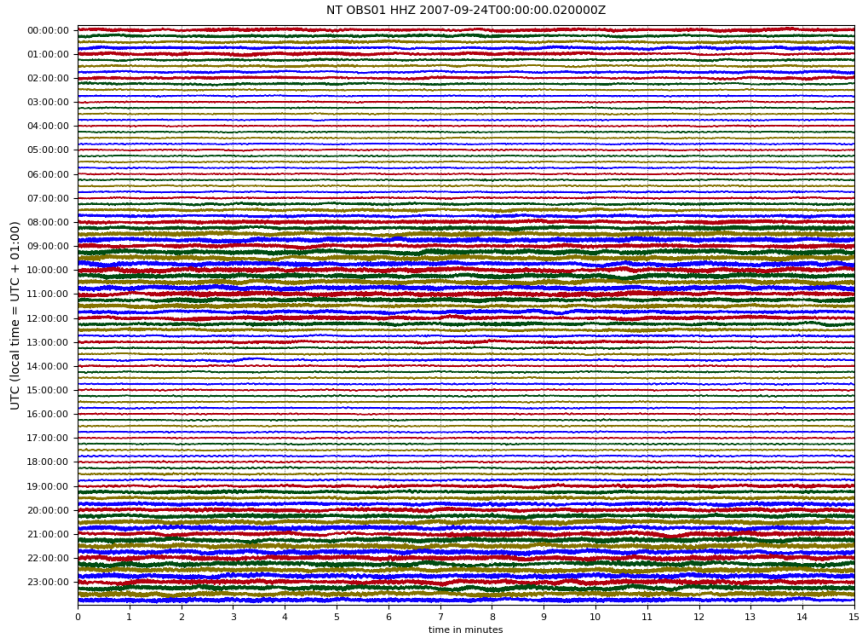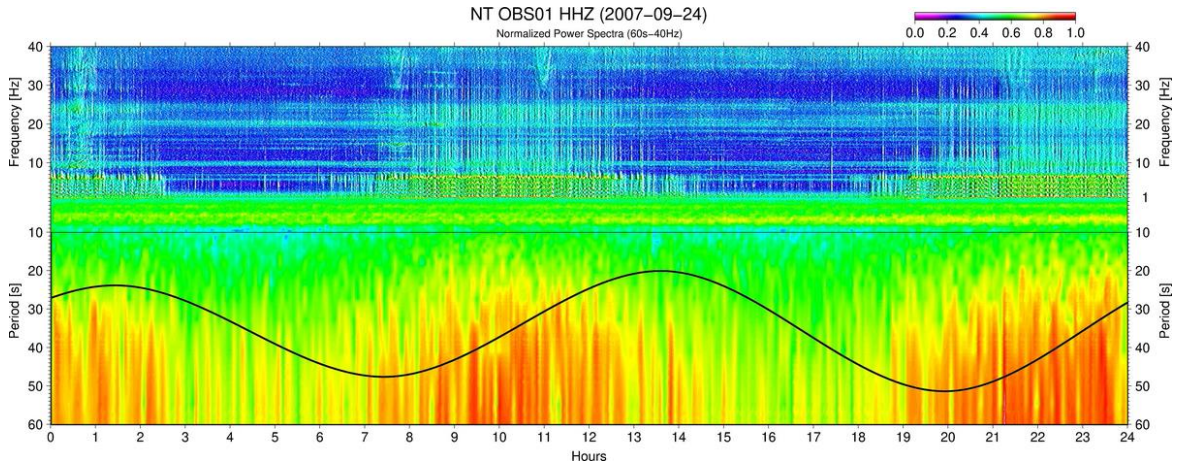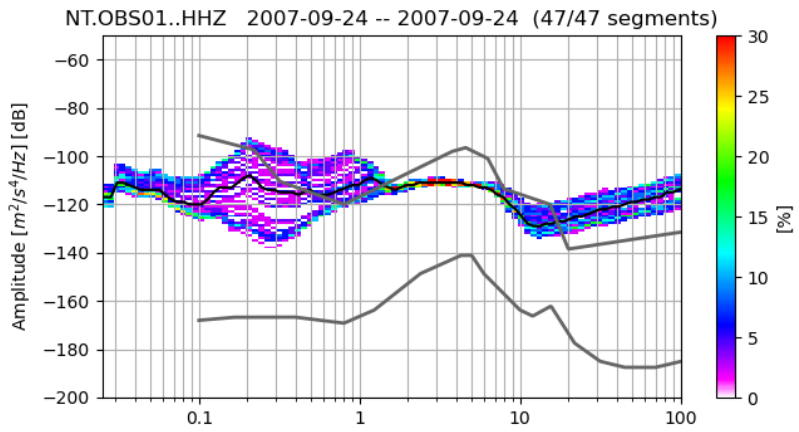

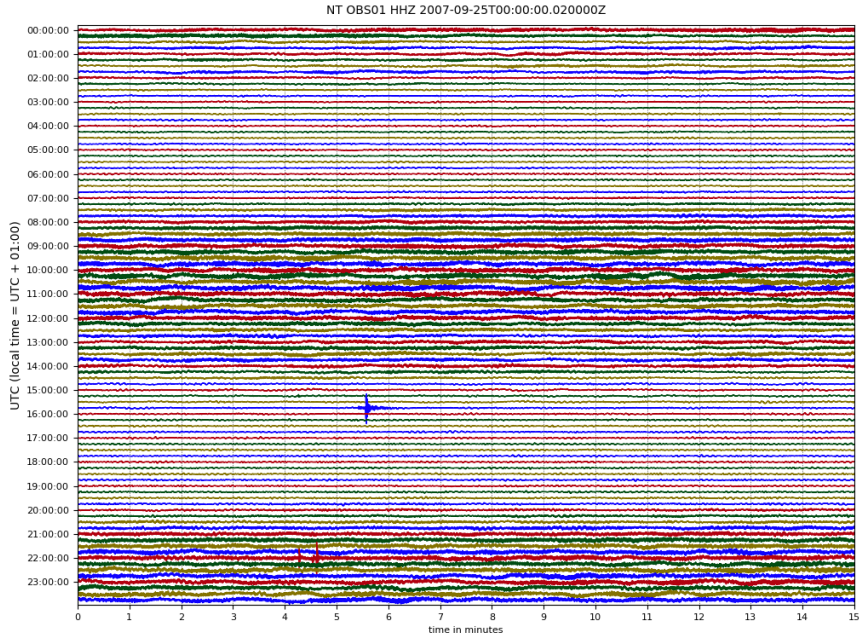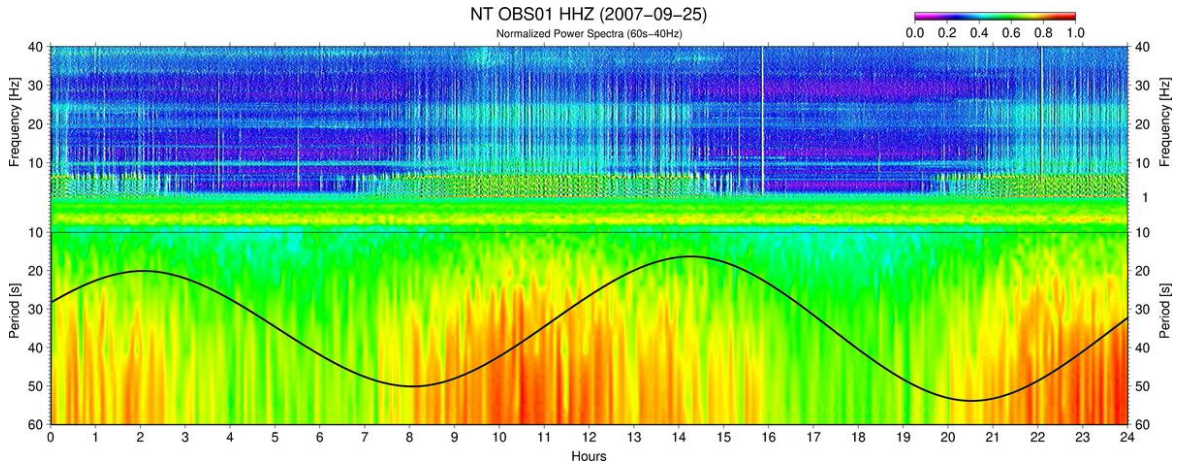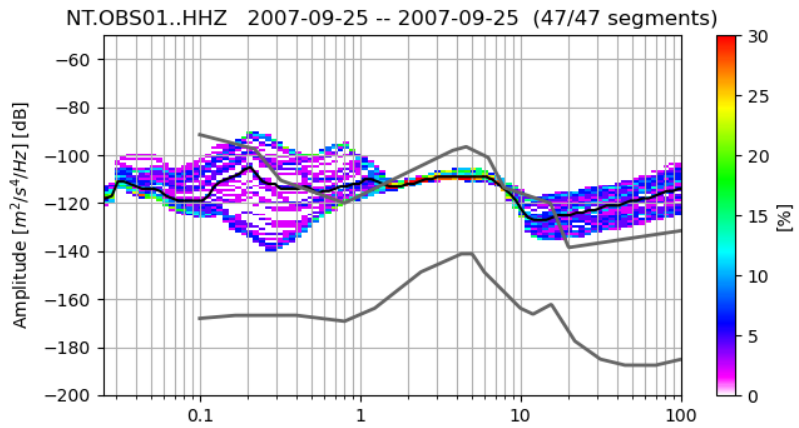

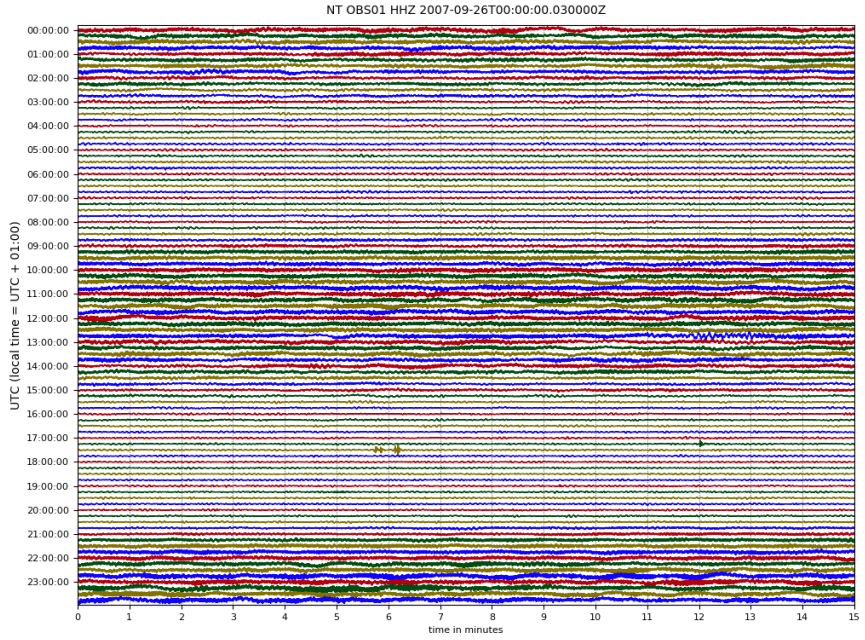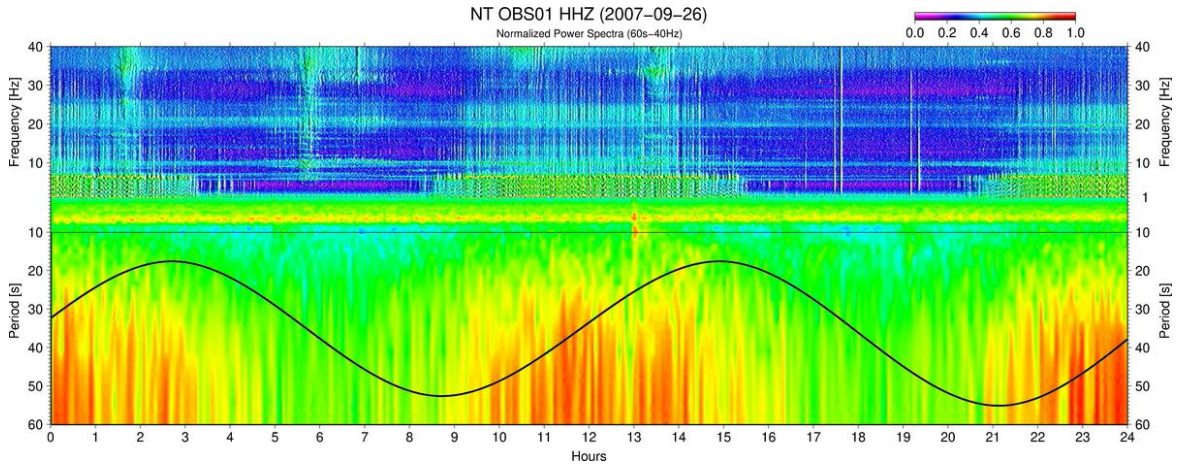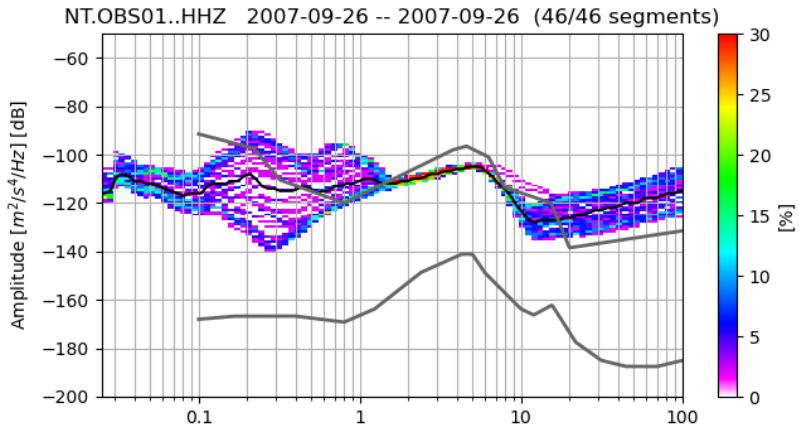

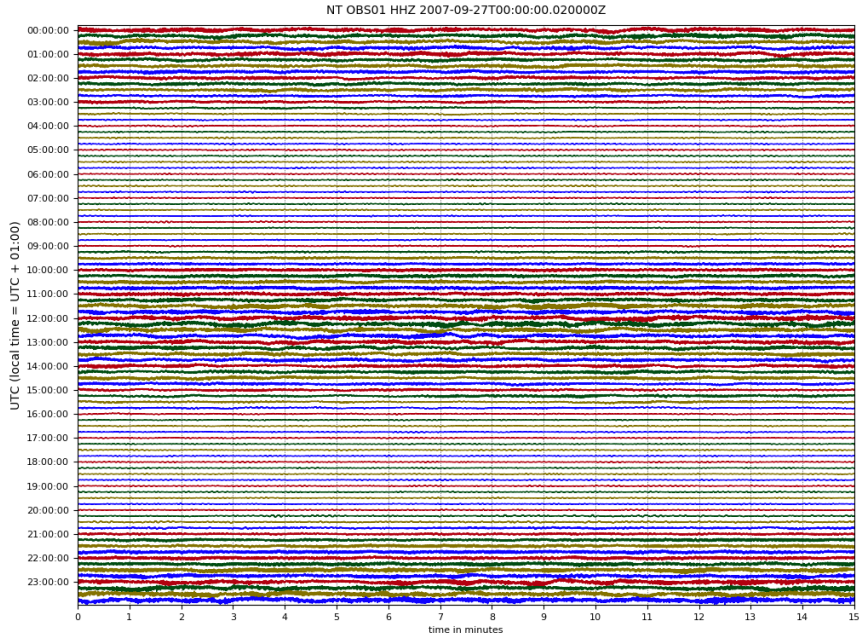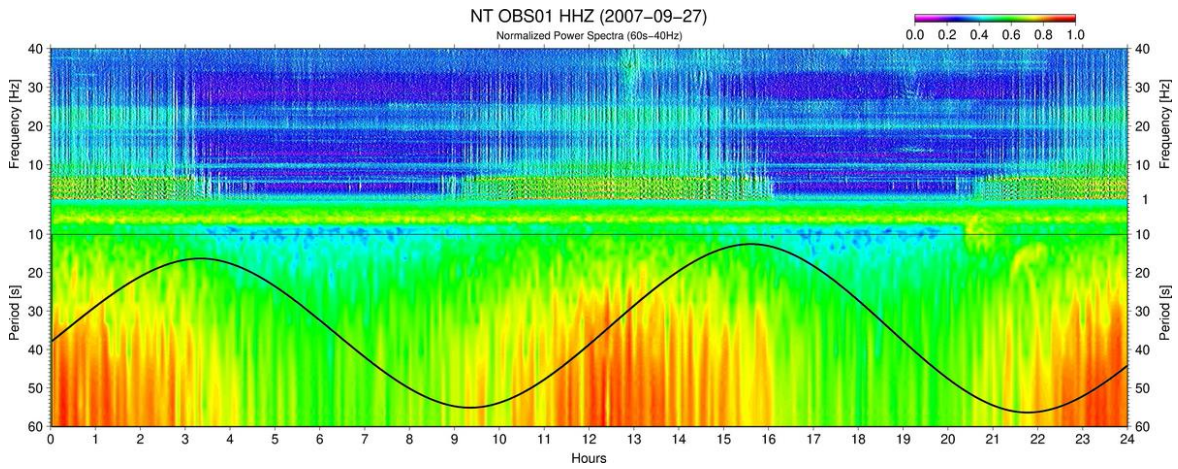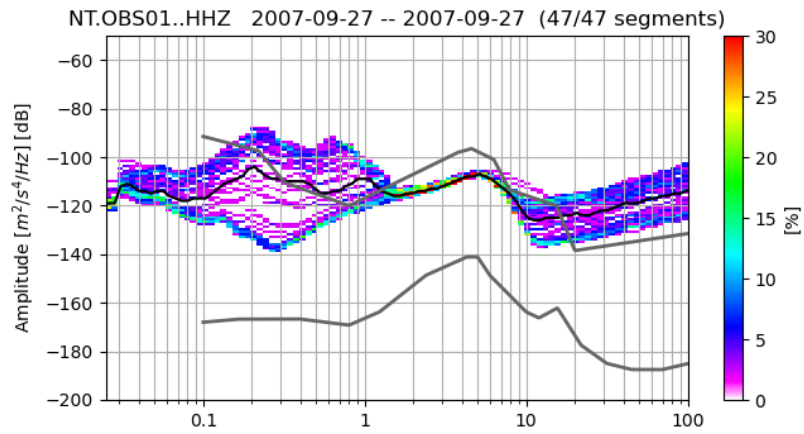

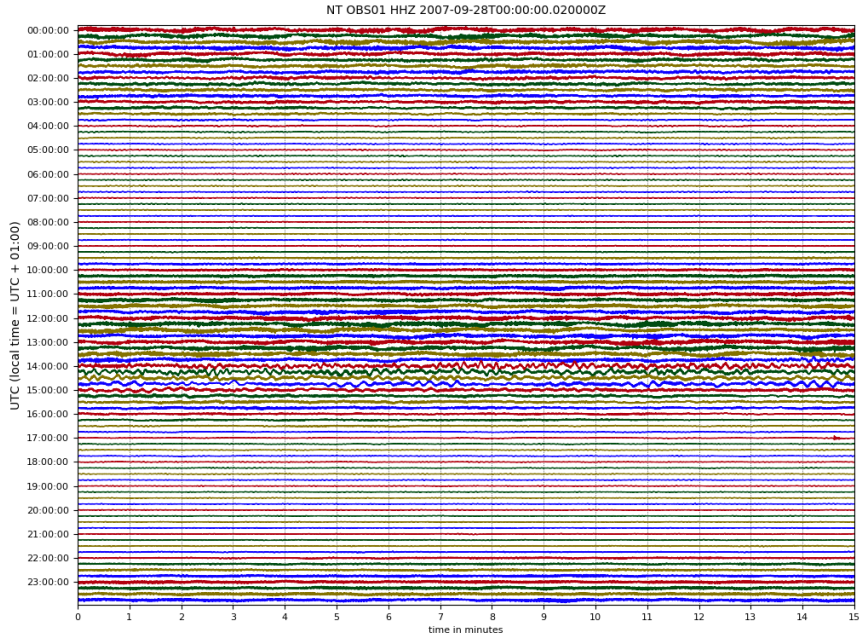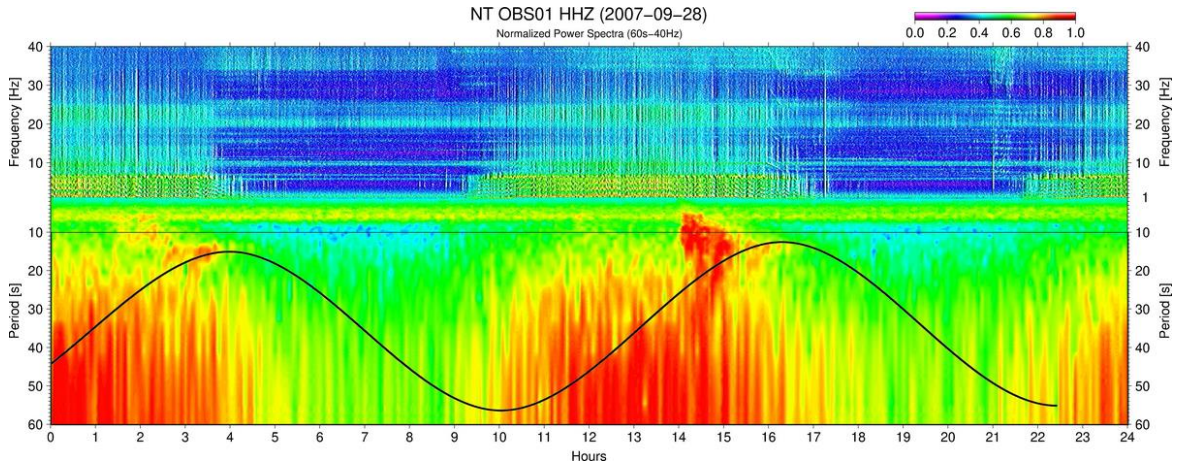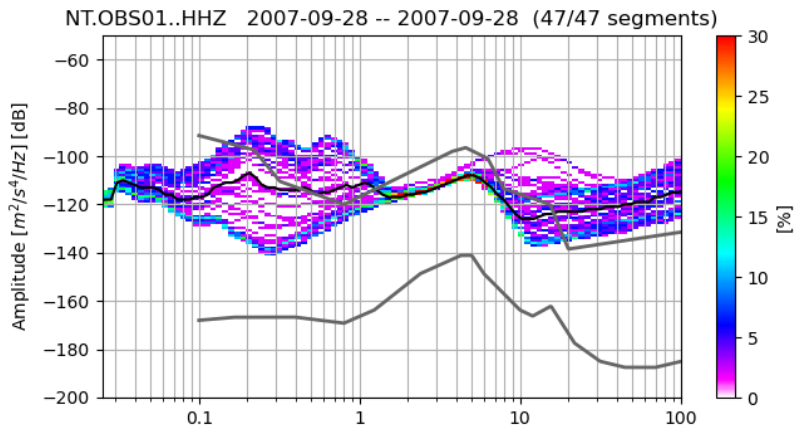

Supplement: Supplementary file 1 [file nhess-2022-196-supplement.pdf]
